1 **Changing Physician Performance: A Systematic Review and Meta-Analysis (75 years 1950-2024) of the Effect**  
2 **of Continuing Medical Education Strategies, Continuous Professional Development and knowledge**  
3 **Translation**

4  
5 **Dr. Ebrahim Abbasi**<sup>1, 2\*</sup> 

6 <sup>1</sup>*Medical Education Department, Medical Education Development Center, Shiraz University of Medical Sciences,*  
7 *Shiraz, Iran*

8 <sup>2</sup>*Department of Medical Entomology and Vector Control, School of Health, Shiraz University of Medical Sciences,*  
9 *Shiraz, Iran*

10 *Email:* [abbasie.ebrahim@gmail.com](mailto:abbasie.ebrahim@gmail.com) [e\\_abbasie@sums.ac.ir](mailto:e_abbasie@sums.ac.ir)

11 *Mobile:* +98912-4338389 *ORCID:* 0000-0003-1861-5321

12  
13 **Running Title:** Changing Physician Performance

14  
15 **ABSTRACT**

16 **Introduction:** Medical education has always been considered an essential component for improving the knowledge  
17 and performance of physicians and medical assistants. However, this education must be carried out continuously to  
18 update the knowledge of physicians and improve their performance. Various strategies are used to achieve this goal,  
19 the most important of which are CME, CPD, and CBME strategies. This study aimed to investigate the effect of  
20 using these strategies on improving the performance of physicians in the world using a systematic review method.

21 **Methods:** This study was conducted using a systematic review method on the effect of educational strategies on  
22 improving the performance of physicians in the world. Accordingly, all relevant articles published between 1950  
23 and 2024 were extracted and reviewed through a search in the scientific databases PubMed/Medline, Web of  
24 Science, ProQuest, and Scopus. The quality of the articles was assessed using the CONSORT checklist and  
25 Newcastle-Ottawa Scale.

26 **Results:** twenty articles conducted between 1993 and 2024 were included in the systematic review process.  
27 According to the findings, providing continuing education based on CME, CPD, CBME, and knowledge translation  
28 strategies positively affected the knowledge, skills, and performance of physicians and medical assistants in  
29 providing health services. This can be used to train medical students and practicing physicians on an ongoing basis.

30 **Conclusion:** Medical education using CME, CPD, and CBME strategies can improve physicians' knowledge and  
31 performance, and subsequently increase job satisfaction, self-efficacy, communication skills, medical knowledge,  
32 performance, and skill. However, individual, structural, and content limitations that can prevent success in learning  
33 and training programs should be considered and addressed.

34 **Keywords:** Physician Performance, Continuing Medical Education Strategies, Continuous Professional  
35 Development, knowledge Translation, Systematic Review.

36  
37

38

39 ***INTRODUCTION***

40 Medical education focuses on providing training and practical experience to physicians, medical staff, and students.  
41 The goal of this type of education is to enhance knowledge, learning, performance, and interaction with patients and  
42 other members of the community. Medical education can be conducted in various settings, including hospitals,  
43 clinics, universities, and educational centers (1, 2). To improve the quality of health services and care provided to  
44 patients by providing clinical and practical education (3). Today, various approaches are used to educate medical  
45 groups, including Continuing Medical Education (CME), Continuous Professional Development (CPD), and  
46 Community-Based Medical Education (CBME) (4, 5).

47 Continuing medical education (CME), as an essential component of medical education systems, provides lifelong  
48 learning opportunities to individuals studying or working in the medical field and improves and ensures the quality  
49 of their performance (6). Continuing education (CE) maintains competence and develops knowledge and science in  
50 new areas of medicine for healthcare professionals. CME system activities can be carried out in the form of online  
51 programs, live and web-based educational programs, written publications, simulations, conferences, scientific  
52 meetings, and practical practice-based skills. These programs or contents can be presented or developed by  
53 experienced professors in specialized fields (7, 8). Continuing professional development (CPD) is an effective  
54 strategy for maintaining and developing knowledge and skills in the field of medical professions. This system can  
55 strengthen skills, develop them to a new level, and expand their job roles (9). Many companies and organizations  
56 constantly prioritize CPD due to the need to develop and improve the job performance of their workforce. CPD  
57 activities can include workshops, conferences, seminars, and training courses, as well as informal approaches such  
58 as reading, work-based learning, or variable mentoring (10, 11). Community-based medical education (CBME) is  
59 another approach used to educate, empower, and improve the knowledge and practice of medical staff, emphasizing  
60 the importance of community participation in the educational process (2). The goal of CBME is to empower  
61 individuals and communities to actively shape educational experiences and outcomes (12). This approach promotes  
62 the participation of communities, families, and medical staff in health care, and improves their knowledge, practice,  
63 and well-being (13). Community-based medical education for physicians and medical residents, by focusing on  
64 curriculum design, clinical education, and clinical practice, can promote the social accountability of the health sector  
65 and also create the ability to adapt to different cultures (14).

66 Various countries in the world, including European and American countries, emphasize the use of strategies to  
67 improve the knowledge and performance of physicians, including CME, CPD, and CBME, and in many of them,  
68 participation in educational programs based on these approaches has been mandatory for physicians (6, 7). In  
69 general, today, attention has been paid to the use of the aforementioned strategies in the form of conferences,  
70 congresses, and web-based programs to improve the performance of physicians and medical assistants (4). However,  
71 some studies have mentioned contradictions regarding the use of strategies and their associated limitations.  
72 Accordingly, this study was conducted to investigate the use of CME, CPD, and CBME strategies to improve the  
73 performance of physicians and medical assistants in the world using a systematic review method.

74

75 **MATERIAL AND METHODS**

76 This study was conducted as a systematic review of physician practice change strategies worldwide according to the  
77 Preferred Reporting Items for Systematic Reviews and Meta-Analysis (PRISMA) guidelines (15).

78 This research has been registered in the International Prospective Register of Systematic Review (PROSPERO) with  
79 the CRD42025649098.

80 **Search strategy**

81 Searching for articles in the international databases PubMed/Medline, Web of Science, ProQuest, and Scopus  
82 without time limits until the end of 2024 using the keywords Doctor's Assistant, Physicians' Extender, Physicians',  
83 Physician Assistant, Continuing Medical Education, Education, Continuing Medical, Medical Education,  
84 professional development, staff development, professional training, workplace training, professional education,  
85 ongoing training, continuing professional development, Biomedical Translational Science, Translational Sciences.  
86 Translational Medicine, Knowledge Translation was performed individually and in combination using the OR and  
87 AND operators in the title, abstract, and full text, and all relevant articles were extracted.

88 **Inclusion and Exclusion Criteria**

89 Articles with the following criteria: 1- Articles on changing the performance of physicians and medical staff; 2-  
90 CME, CPD, and knowledge translation strategies were examined; 3- They were conducted on physicians and  
91 medical staff; 4- The outcome of the intervention was specified; and 5- They were of desirable quality were included  
92 in the study. Articles that did not meet the inclusion criteria were excluded from the study.

93 **Quality Assessment**

94 Article quality assessment was performed for interventional studies using the CONSORT checklist (16) and for  
95 observational studies using the Newcastle-Ottawa Scale (NOS) checklist (17) according to the guidelines. To  
96 classify the quality of articles, a score of less than 50% was considered poor quality, a score of 50 to 75% was  
97 considered moderate quality, and a score of more than 75% was considered high quality. Articles with moderate to  
98 high quality were included in the study.

99 **Selection of Studies**

100 A total of 35,581 articles were extracted in the initial search. Then, the articles were entered into Endnote software  
101 duplicates were identified, and 7175 articles were excluded due to duplication. In the next step, by carefully  
102 studying the titles and abstracts of the articles, 26167 articles were excluded due to their irrelevance to the study.  
103 Then, the full text of 2239 articles were reviewed, and 2219 articles were excluded from the study due to the lack of  
104 examination of educational interventions and their impact on physician performance. Finally, 20 articles were  
105 included in the systematic review process (Figure 1).

106 **Data extraction**

107 Data extraction was performed independently by two researchers. Accordingly, the full text of the articles that met  
108 the inclusion criteria was first reviewed. If the articles were rejected by the two researchers, the reason was stated,  
109 and in case of disagreement between them, the article was reviewed by a third person. Data extraction was  
110 performed using a checklist that included the characteristics of the first author, the publication date of the article,  
111 sample size, strategy and type of intervention, and the outcome of the intervention.

112

## 113 **RESULTS**

114 A total of 20 articles that were conducted between 1993 and 2024 were included in the systematic review process. 9  
115 articles were conducted in the field of CME, 8 articles in the field of CPD, and one article each in the fields of  
116 CBME, RTME, and HPE. The characteristics of the articles included in the systematic review are presented in Table  
117 1.

118 The use of educational methods to improve the performance of medical staff has received great attention and is used  
119 in the health systems of different countries. The most important of these methods are Continuing Medical Education  
120 (CME), Community-Based Medical Education (CBME), and Continued Professional Development (CPD). We will  
121 investigate them in the following.

### 122 **1- Continuing Medical Education (CME)**

123 In the study of Wang et al. (2024), the needs of gynecologists in the field of education with CME methods and  
124 educational content were examined. Based on the findings, continuing education in the fields of female  
125 endocrinology, abnormal uterine bleeding, and polycystic ovary syndrome was needed by gynecologists and  
126 improve their performance in these fields (18). Jayas et al. (2023) noted that the need for physicians to stay up-to-  
127 date with medical information led to an increase in their willingness to participate in CME (19). Pott et al. (2021)  
128 noted that the topic, quality of content, availability of accredited CME, and focus on clinical practice were among  
129 the factors that influenced physicians' choice of CME activities. Being live, online, and care-based were among the  
130 features that influenced physicians' participation in CME. Because being online reduced costs and time, and being  
131 live led to better teaching and focused on content (20). Gill et al. (2016) evaluated the effectiveness of SMS-based  
132 CME on clinical knowledge retention of community-based physician assistants (CBPA). The findings did not show  
133 a significant increase in job satisfaction, self-efficacy, and medical knowledge scores (21). In a study by Shah et al.  
134 (2012), it was shown that the average weekly duration of self-study among Pakistani family physicians was 6.5  
135 hours, and these physicians were trained without practice and acquired most of their knowledge from books. As a  
136 result, they emphasized the use of online CME to improve knowledge and performance (22). Liljestrand et al.  
137 (2004) showed that physicians and nurses providing health care to HIV patients who had participated in CME and  
138 had more experience in this field were more skilled and satisfied in providing counseling to patients and were more  
139 willing to recruit HIV patients (23). Davis et al. (1995) in their review study showed that the participation of  
140 physicians and medical residents in CME had a positive effect on health care. Effective change strategies included  
141 reminders, strategies to strengthen health care delivery including practical practice with patients, mediation  
142 interventions, information, and multimodal activities that could influence the training activities of physicians and  
143 medical residents(24, 25). Levinson et al. compared the effects of two short-term programs (a 4-hour workshop and  
144 a 2-hour course) and long-term programs (a 2.5-day course) on the communication skills of physicians with patients.  
145 Based on the findings, physicians who had participated in the long program asked more open-ended questions, asked  
146 more patient opinions, and provided more biomedical information. Also, their patients tended to provide more  
147 biomedical and psychosocial information, and by reducing negative affect between the patient and the doctor,  
148 patients tended to show fewer signs of external distress. Which ultimately increased their satisfaction (26).

149 Eickmann et al. (2024) conducted a qualitative study in German hematologists that examined barriers and  
150 facilitators to participation in CME. Personal limitations, structural limitations, and content-related limitations were  
151 among the barriers to learning and training. To overcome these barriers, attention should be paid to identifying  
152 appropriate CME courses, targeting specific audiences, and training tailored to individual needs to improve  
153 performance (27). In general, it can be noted that the use of the CME method can improve the knowledge and  
154 performance of medical personnel, physician assistants, and nurses in the field of health services.

## 155 **2- Continued Professional Development (CPD)**

156 Continuing professional development (CPD) is a cornerstone of primary health care. Al-Sheikhly et al. (2023)  
157 emphasized the necessity of CPD to improve physician performance and mentioned that activities during working  
158 hours, cost, and work commitments are the most important barriers to physician participation in this program, which  
159 should be addressed to develop physician participation as much as possible. Participants also preferred workshops,  
160 traditional lectures, case-based sessions, small groups, and online learning to participate in CPD (28). Tavares et al.  
161 (2022) mentioned the use of experiential educational simulation for CPD as another method that can increase  
162 physician participation in CPD. Simulation is an experiential educational method that helps individuals experience a  
163 therapeutic method with a clinical intervention in a clinical and practical environment. As a result, using this method  
164 to train and improve physician performance can be an effective measure, although factors such as familiarity with  
165 simulation, psychological safety, and direct connection to clinical practice are effective in increasing participation  
166 (29). Kozikowski et al. (2021) noted that medical assistants seeking the National Council for Physician Assistant  
167 Certification (NCCPA) reported using CPD as an effective way to update their medical knowledge (30). In a study  
168 by Whicker et al. (2020), continuing education, career planning, legal requirements, and commitment to learning  
169 were among the factors influencing CPD. CPD was also shown to play an important role in the professional  
170 development of physicians (31). Breunig et al. (2020) showed that the use of clinical cases in CME for the training  
171 of physician assistants (PAs) and nurse practitioners (NPs) significantly improved the effectiveness of teaching in  
172 PA and NP learners (32). Alexander et al. (2018) showed that participation in a professional development program  
173 for PAs improved knowledge, skills, and resources. However, it was noted that educational success, program  
174 director stability, involvement in leadership, and service activities had a positive impact on participants' professional  
175 development (33). Howie et al. (2017) stated that continuing professional development (CPD) is important for all  
176 healthcare professionals and improves performance and quality of patient care. As a result, it was recommended that  
177 educational supervisors use learning strategies to train PAs that enhance their clinical skills (34). Rao et al. (2010) in  
178 the UK emphasized the use of CPD to train physicians and psychiatrists to improve patient care, and good  
179 psychiatric practice and increase their credibility (35). CPD is one of the effective methods for training and  
180 developing the performance of medical personnel, as a result, studies have emphasized the use of this method to  
181 improve the knowledge and performance of this group.

## 182 **3- HPE, CBME and RTME**

183 RTME is another method that can have a positive impact on the knowledge, skills, and performance of physicians  
184 and the medical team. Kulo et al. (2022) reviewed that health professions education (HPE) can enhance the  
185 professional development of health professions faculty and can enhance their knowledge and skills for teaching and

186 learning roles (36). Miskeen et al. (2023) reported that primary care physicians (PCPs) had a reasonable level of  
187 awareness and engagement in community-based medical education (CBME) classes and demonstrated that this  
188 perspective could facilitate curriculum development and create effective partnerships for CBME participation (5).  
189 Jin et al. (2023) found that rural tuition-free medical education (RTME) for free physician education led to increased  
190 physician job satisfaction, greater promotion opportunities, a relaxed work environment, the development of  
191 community health services, and easier access to higher technical titles (37). In general, using the aforementioned  
192 strategies, taking into account individual circumstances, and providing content and appropriate needs of physicians,  
193 can improve the knowledge and performance of physicians and medical assistants in providing health services.

194  
195 ***DISCUSSION***

196 Education is the main pillar of acquiring knowledge and keeping it up to date. By acquiring knowledge, one can  
197 improve skills and improve performance. Given the continuous advancement of medical science and related  
198 knowledge, continuous acquisition of knowledge in this field is essential (38). Accordingly, various strategies,  
199 including CME, CPD, and CBME, are used to provide continuous education and educational content to medical  
200 students, physicians, and medical residents (39, 40). These strategies help these groups acquire knowledge by  
201 designing and making available the educational content needed by these groups so that many countries have made  
202 participation in these courses and educational content necessary and mandatory. The characteristics of these  
203 strategies include the appropriateness of the subject, method, and educational content of CME, keeping medical  
204 information up to date, improving the quality of content, accessibility of CME, focusing on clinical education, being  
205 web-based and online, increasing job satisfaction and self-efficacy, practical practice, and being care-based in  
206 services. The results of the studies reviewed in the present study have shown that the use of the aforementioned  
207 strategies can improve the knowledge and performance of physicians in providing health services (41, 42).

208 Physicians working in healthcare systems are under great pressure due to the rapid change and development of  
209 medical science, treatment methods, and healthcare(43, 44). Continuing medical education helps them to adapt to  
210 medical advances, familiarize themselves with them, and be able to provide optimal care (42). Medical education  
211 using CME, CPD, and CBME strategies and the frameworks determined by education officials in organizations  
212 helps physicians balance professional responsibilities and current knowledge and improve performance and  
213 efficiency in learning and providing quality services (45-47). In general, continuing medical education using the  
214 aforementioned strategies plays a fundamental role in the professional development of physicians. Medical  
215 education can significantly change their knowledge, attitudes, performance, and skills. The use of CME, CPD, and  
216 other valid, innovative, and flexible strategies has important effects in meeting clinical needs and healthcare  
217 services. These strategies can enhance the competence of physicians and provide valuable opportunities to improve  
218 the quality of services in hospitals and health centers (40, 48, 49).

219 In the present study, barriers such as inappropriate topics, content, time, time commitment, cost, and lack of  
220 financial support limited participation in continuing education programs. Studies have indicated that educators and  
221 professors involved in CME design should consider personalization, repeatability, and adaptability to advances in  
222 educational technology and develop educational programs to maximize participation (50). In general, using learner-

223 centered activities and a wide selection of strategies and content areas to meet the needs of physicians in their living  
224 and working environments, and choosing learning methods such as webinars, conferences, group discussions,  
225 problem-solving, and case studies that can form part of the educational activities in the lives of physicians and be  
226 available to them. In general, most physicians need a combination of educational opportunities to access the best  
227 practices and to meet their educational needs by selecting appropriate educational activities. CME, CPD, and CBME  
228 strategies can be very helpful in this regard (51, 52).

## 229 **CONCLUSION**

230 The present study showed that educational strategies including CME, CPD, and CBME can improve physicians'  
231 knowledge and performance, increase job satisfaction, self-efficacy, communication skills, knowledge, performance,  
232 and medical skills, and create a positive change in the provision of health care. However, individual, structural, and  
233 content limitations were among the barriers to learning and training in this field, which need to be addressed to  
234 improve the use of these strategies and physicians' performance.

## 235 **Declaration**

### 236 **Ethics approval and consent to participate**

237 Not applicable

### 238 **Data Availability Statement**

239 All data generated or analyzed during this study are included in this published article.

### 240 **Competing interests**

241 The authors declare no competing interests.

### 242 **Consent for publication**

243 Not applicable

### 244 **Funding**

245 This study was conducted at the request of Shiraz University of Medical Sciences, Iran, with number  
246 IR.SUMS.SCHEANUT.REC.1401.690.

### 247 **Authors' contributions**

248 E.A. has conducted all parts of the study, including design, execution, and writing the manuscript.

### 249 **Acknowledgments**

250 The author would like to thank the Research Vice-Chancellor of Shiraz University of Medical Sciences.

## 251 **REFERENCES**

- 252 1. D'Adamo CR, Workman K, Barnabic C, Retener N, Siaton B, Piedrahita G, et al. Culinary medicine  
253 training in core medical school curriculum improved medical student nutrition knowledge and confidence in  
254 providing nutrition counseling. *American Journal of Lifestyle Medicine*. 2022;16(6):740-52.
- 255 2. Claramita M, Setiawati EP, Kristina TN, Emilia O, van der Vleuten C. Community-based educational  
256 design for undergraduate medical education: a grounded theory study. *BMC medical education*. 2019;19:1-10.
- 257 3. Pagatpatan Jr CP, Valdezco JAT, Lauron JDC. Teaching the affective domain in community-based medical  
258 education: A scoping review. *Medical teacher*. 2020;42(5):507-14.

- 259 4. Sherman L, Halila H, Chappell K. An Overview of Continuing Medical Education/Continuing Professional  
260 Development Systems in Europe: A Mixed Methods Assessment. *Journal of CME*. 2024;13(1):2435731.
- 261 5. Miskeen E, Al-Shahrani AM, editors. The Primary Healthcare Physician's Awareness and Engagement in  
262 Community-Based Medical Education: A Mixed Qualitative and Quantitative Study. *Healthcare*; 2023: MDPI.
- 263 6. Saita T, Dri P. Evaluation of continuing medical education (CME) systems across the 27 European  
264 countries. *Creative education*. 2014;2014.
- 265 7. Solé M, Panteli D, Riso-Gill I, Döring N, Busse R, McKee M, et al. How do medical doctors in the  
266 European Union demonstrate that they continue to meet criteria for registration and licencing? *Clinical Medicine*.  
267 2014;14(6):633-9.
- 268 8. Sholl S, Ajjawi R, Allbutt H, Butler J, Jindal S, Snape D, Morrison J, et al. Balancing health care education  
269 and patient care in the UK workplace: a realist synthesis. *Medical Education*. 2017;51(8):787-801.
- 270 9. Undilashvili A, Beriashvili R, Khutsishvili L. Needs Assessment For effective continuous professional  
271 development of physicians In Georgia. *GEORGIAN MEDICAL*. 2020:152.
- 272 10. Undilashvili A, Ebralidze K, Beriashvili R. CONTINUOUS PROFESSIONAL DEVELOPMENT OF  
273 HEALTHCARE WORKERS-ANALYSIS OF THE CURRENT STATE. *Georgian Medical News*. 2019(297):158-  
274 63.
- 275 11. Hanlon HR, Prihodova L, Russell T, Donegan D, O'Shaughnessy A, Hoey H. Doctors' engagement with a  
276 formal system of continuing professional development in Ireland: a qualitative study in perceived benefits, barriers  
277 and potential improvements. *BMJ open*. 2021;11(11):e049204.
- 278 12. Yacoby Y, Girash J, Parkes DC, editors. Empowering First-Year Computer Science Ph. D. Students to  
279 Create a Culture that Values Community and Mental Health. *Proceedings of the 54th ACM Technical Symposium*  
280 *on Computer Science Education V 1*; 2023.
- 281 13. Patrick LE, Duggan JM, Dizney L. Integrating evidence-based teaching practices into the mammalogy  
282 classroom. *Journal of Mammalogy*. 2023;104(4):685-95.
- 283 14. Karunathilake I, Kristina TN. Curriculum design of community-based education, toward social  
284 accountability of health profession education. *Challenges and Opportunities in Health Professions Education:*  
285 *Perspectives in the Context of Cultural Diversity*: Springer; 2022. p. 87-109.
- 286 15. Salameh J-P, Bossuyt PM, McGrath TA, Thombs BD, Hyde CJ, Macaskill P, et al. Preferred reporting  
287 items for systematic review and meta-analysis of diagnostic test accuracy studies (PRISMA-DTA): explanation,  
288 elaboration, and checklist. *bmj*. 2020;370.
- 289 16. Schulz KF, Altman DG, Moher D. CONSORT 2010 statement: updated guidelines for reporting parallel  
290 group randomised trials. *Journal of Pharmacology and pharmacotherapeutics*. 2010;1(2):100-7.
- 291 17. Wells GA, Shea B, O'Connell D, Peterson J, Welch V, Losos M, et al. The Newcastle-Ottawa Scale (NOS)  
292 for assessing the quality of nonrandomised studies in meta-analyses. 2000.
- 293 18. Wang H, Sun A, Zhang Z, Chen J, Dong H, Zou Y, et al. Investigation on the Different Needs of Practicing  
294 Doctors for Continuing Medical Education under the Three-Level Medical System in China. *Clinical and*  
295 *Experimental Obstetrics & Gynecology*. 2024;51(3):65.



- 296 19. Jayas A, Andriole DA, Grbic D, Hu X, Dill M, Howley LD. Physicians' continuing medical education  
297 activities and satisfaction with their ability to stay current in medical information and practice: A cross-sectional  
298 study. *Health Science Reports*. 2023;6(2):e11110.
- 299 20. Pott MOB, Blanshan AS, Huneke KM, Thomas BLB, Cook DA. What influences choice of continuing  
300 medical education modalities and providers? A national survey of US physicians, nurse practitioners, and physician  
301 assistants. *Academic Medicine*. 2021;96(1):93-100.
- 302 21. Gill CJ, Le Ngoc B, Halim N, Nguyen Viet H, Larson Williams A, Nguyen Van T, et al. The mCME  
303 Project: a randomized controlled trial of an SMS-based continuing medical education intervention for improving  
304 medical knowledge among Vietnamese community based physicians' assistants. *PLoS One*. 2016;11(11):e0166293.
- 305 22. Shah N, Ashraf H, Anwar F, Khan A, Akhtar H, Abro MA. Status of postgraduate training and continuing  
306 medical education of family physicians in Pakistan. 2012.
- 307 23. Liljestrand P. HIV care: continuing medical education and consultation needs of nurses, physicians, and  
308 pharmacists. *Journal of the Association of Nurses in AIDS Care*. 2004;15(2):38-50.
- 309 24. Abbasi E, Bazrafkan L, Faghihi SAA, Azizi K, Moemenbellah-Fard MD. Assessing the role of medical  
310 entomology in general medicine education in Iran: expert perspectives and curriculum implications. *BMC Medical  
311 Education*. 2025;25(1):139.
- 312 25. Davis DA, Thomson MA, Oxman AD, Haynes RB. Changing physician performance: a systematic review  
313 of the effect of continuing medical education strategies. *Jama*. 1995;274(9):700-5.
- 314 26. Levinson W, Roter D. The effects of two continuing medical education programs on communication skills  
315 of practicing primary care physicians. *Journal of General Internal Medicine*. 1993;8:318-24.
- 316 27. Eickmann S, Wolff D, Kobbe G, Dreger P, Kröger N, Herrmann-Johns A. Barriers and Facilitators in  
317 Continuous Medical Education Related to Allogeneic Stem Cell Transplantation: A Qualitative Study of Physicians.  
318 *Oncology Research and Treatment*. 2024;47(4):136-44.
- 319 28. Al-Sheikhly D, Ali S, Navti PSM, Mahfoud ZR, Mattar L, Aboulsoud S, et al. Self-reported preferences  
320 and barriers to continued professional development in primary care physicians: a cross-sectional web-based survey  
321 in Qatar. *BMC Primary Care*. 2023;24(1):273.
- 322 29. Tavares W, Piquette D, Luong D, Chiu M, Dyte C, Fraser K, et al. Exploring the study of simulation as a  
323 continuing professional development strategy for physicians. *Journal of Continuing Education in the Health  
324 Professions*. 2022;10.1097.
- 325 30. Kozikowski A, Mauldin S, Jeffery C, Kavanaugh K, Barnhill G, Morton-Rias D. Public knowledge and  
326 beliefs regarding licensure, certification and medical education of physician assistants. *Journal of Medical  
327 Regulation*. 2021;107(1):26-34.
- 328 31. Whicker SA, Nagler A. Continuing Professional Development: Supporting the Complex Role of Today's  
329 Physician. *Handbook of Research on the Efficacy of Training Programs and Systems in Medical Education: IGI  
330 Global*; 2020. p. 1-22.

- 331 32. Breunig MJ, Herber AJ, Jenkins SM, Newman JS, Beckman TJ, Wittich CM, et al. Characteristics of  
332 effective continuing medical education for physician assistants and nurse practitioners in hospital medicine. *The*  
333 *Journal of Physician Assistant Education*. 2020;31(1):2-7.
- 334 33. Alexander LM, Auth P, Carlson R, Davison M. Assessing the impact of a professional development  
335 program for physician assistant program directors. *The Journal of Physician Assistant Education*. 2018;29(3):138-  
336 43.
- 337 34. Howie N. Continuing professional development for Physician Associates in primary care. *Education for*  
338 *Primary Care*. 2017;28(4):197-200.
- 339 35. Rao R. Continuing professional development for staff and associate specialist grade doctors: the final  
340 frontier? *The Psychiatrist*. 2010;34(12):533-6.
- 341 36. Kulo V, Cestone C. A continuing professional development imperative? Examining trends and  
342 characteristics of health professions education doctoral programs. *BMC Medical Education*. 2022;22(1):853.
- 343 37. Jin R, Chen Y. Job satisfaction of village doctors in a rural-oriented tuition-waived medical education  
344 program in China. *Frontiers in Psychology*. 2023;14:1184430.
- 345 38. Moran J, Briscoe G, Peglow S. Current technology in advancing medical education: perspectives for  
346 learning and providing care. *Academic psychiatry*. 2018;42:796-9.
- 347 39. Luneta K. Designing continuous professional development programmes for teachers: A literature review.  
348 *Africa Education Review*. 2012;9(2):360-79.
- 349 40. McMahon G. Transparency in continuing medical education. *The Lancet*. 2018;391(10137):2323-4.
- 350 41. Densen P. Challenges and opportunities facing medical education. *Transactions of the American Clinical*  
351 *and Climatological Association*. 2011;122:48.
- 352 42. Cervero RM, Gaines JK. The impact of CME on physician performance and patient health outcomes: an  
353 updated synthesis of systematic reviews. *Journal of Continuing Education in the Health Professions*.  
354 2015;35(2):131-8.
- 355 43. Abbasi E. Molecular Surveillance of Sandfly-Borne Phleboviruses in Robat Karim County, Tehran.  
356 *Environmental Challenges*. 2025:101089.
- 357 44. Abbasi E. Investigating the Role of Vitamin D in the Prevention and Control of Dengue Virus Vectors and  
358 Related Diseases: A Systematic Review Study. medRxiv. 2025:2025.01. 07.25320153.
- 359 45. Combes J, Arespacochaga E, editors. Continuing medical education as a strategic resource. American  
360 Hospital Association's Physician Leadership Forum, Chicago, IL; 2014.
- 361 46. Steinman MA, Boscardin CK, Aguayo L, Baron RB. Commercial influence and learner-perceived bias in  
362 continuing medical education. *Academic Medicine*. 2010;85(1):74-9.
- 363 47. Peleman B, Lazzari A, Budginaitė I, Siarova H, Hauari H, Peeters J, et al. Continuous professional  
364 development and ECEC quality: Findings from a European systematic literature review. *European Journal of*  
365 *Education*. 2018;53(1):9-22.
- 366 48. Ahn D. Current trend of accreditation within medical education. *Journal of educational evaluation for*  
367 *health professions*. 2020;17.

- 368 49. Kjaer NK, Vedsted M, Høpner J. A new comprehensive model for continuous professional development.  
369 European Journal of General Practice. 2017;23(1):20-6.
- 370 50. Witteles RM, Verghese A. Accreditation Council for Graduate Medical Education (ACGME) milestones—  
371 time for a revolt? JAMA internal medicine. 2016;176(11):1599-600.
- 372 51. McMahon GT. Incentivising higher level outcome achievement in continuing education: five-year  
373 experience from the ACCME commendation criteria. Journal of CME. 2023;12(1):2141937.
- 374 52. Health BoG, Practice CoMtIoIEoC, Outcomes P. Measuring the impact of interprofessional education on  
375 collaborative practice and patient outcomes. 2016.

376

377

378

379

380

381

382

383

384

385

386

387

388

389

390

391

392

393

394 **Table 1.** Characteristics of articles included in the systematic review process

| <b>Author</b>             | <b>Year of study</b> | <b>of Place of study</b>                | <b>Sample size</b> | <b>Quality assessment</b> | <b>Strategies</b> |
|---------------------------|----------------------|-----------------------------------------|--------------------|---------------------------|-------------------|
| <b>Wang H (18)</b>        | 2024                 | China                                   | 3954               | High                      | CME               |
| <b>Jayas A (19)</b>       | 2023                 | America                                 | 5926               | High                      | CME               |
| <b>Pott M (20)</b>        | 2021                 | USA                                     | 500                | Mild                      | CME               |
| <b>Gill C (21)</b>        | 2016                 | Vietnam                                 | 638                | High                      | CME               |
| <b>Shah N (22)</b>        | 2012                 | Pakistan                                | 1200               | High                      | CME               |
| <b>Liljestrand P (23)</b> | 2004                 | Arizona, California, Hawaii, and Nevada | 731                | High                      | CME               |
| <b>Eickmann S (27)</b>    | 2024                 | German                                  | 13                 | Mild                      | CME               |
| <b>Davis DA (25)</b>      | 1995                 | World                                   | 99                 | High                      | CME               |
| <b>Levinson W (26)</b>    | 1993                 | Portland                                | 62                 | Mild                      | CME               |
| <b>Al Sheikhly D(28)</b>  | 2023                 | Qatar                                   | 281                | Mild                      | CPD               |
| <b>Tavares W (29)</b>     | 2022                 | World                                   | 4                  | Mild                      | CPD               |
| <b>Kozikowski A (30)</b>  | 2021                 | USA                                     | 1388               | High                      | CPD               |
| <b>Whicker SA (31)</b>    | 2020                 | USA                                     | -                  | High                      | CPD               |
| <b>Breunig MJ (32)</b>    | 2020                 | USA                                     | 163                | High                      | CME and CPD       |
| <b>Alexander LM (33)</b>  | 2018                 | USA                                     | 75                 | Mild                      | CPD               |
| <b>Howie N (34)</b>       | 2017                 | England                                 | 1000               | Mild                      | CPD               |
| <b>Rao R (35)</b>         | 2010                 | England                                 | 89                 | Mild                      | CPD               |
| <b>Kulo V (36)</b>        | 2022                 | USA and Canada                          | 20                 | High                      | HPE               |
| <b>Miskeen E (5)</b>      | 2023                 | Saudi Arabia                            | 72                 | High                      | CBME              |
| <b>Jin R (37)</b>         | 2023                 | China                                   | 240                | High                      | RTME              |

395

396

397

398

399

400

401

402

403

404

405

406 **Figure legend**

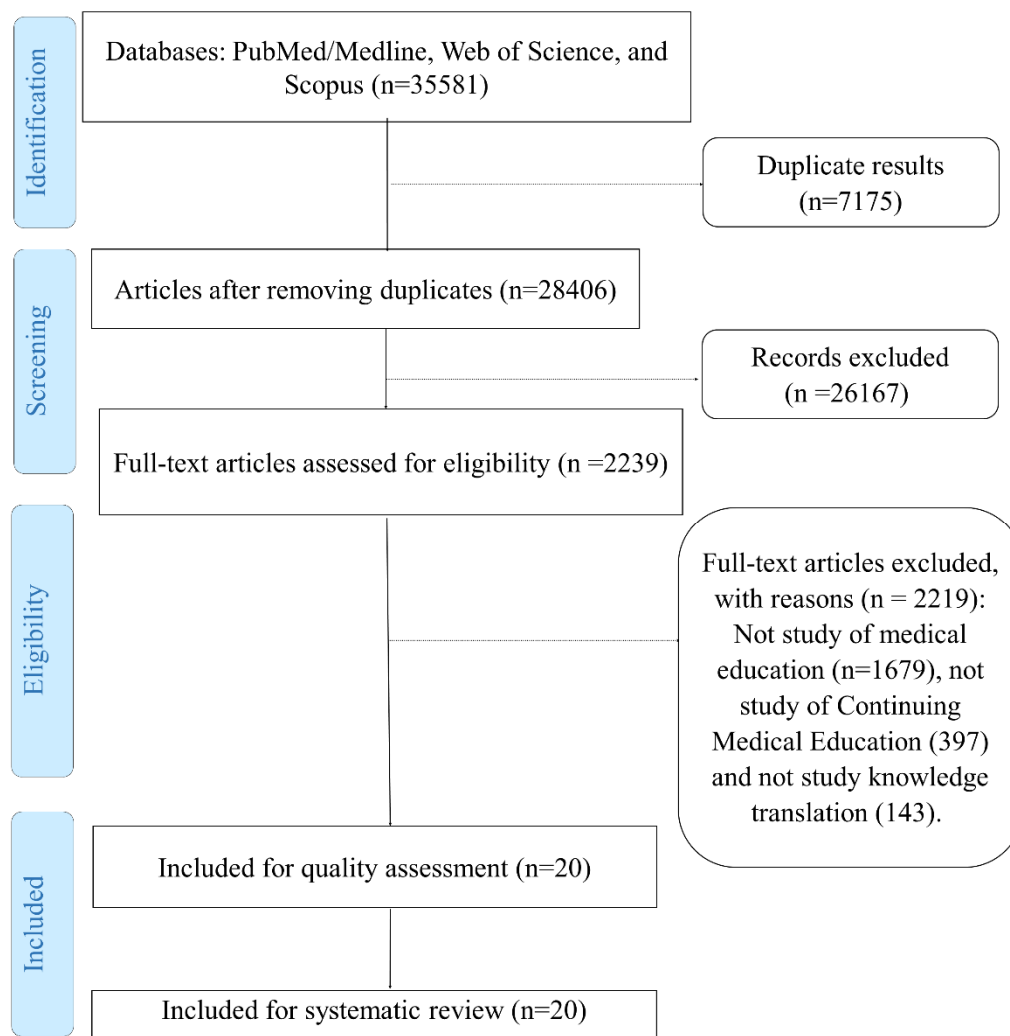

407

408

409

410

**Figure 1.** The PRISMA flow diagram of the search process
